# Supplementary material for: Chronic Bedridden Condition Is Reflected by Substantial Changes in Plasma Inflammatory Profile
Source: MDPI journal article supplement (doi:10.3390/biom12121867), 2022-12-13
Supplement: s1 [file s1]

Supplementary Table S1

| Characteristic                            |  | OLD<br>(n = 11) | CBR<br>(n = 22) |
|-------------------------------------------|--|-----------------|-----------------|
| Age - years                               |  | 85 ± 7          | 88 ± 6          |
| Female - n (%)                            |  | 6 (70)          | 13 (55)*        |
| Bedridden - years                         |  | 0               | 3.8 ± 2.3*      |
| Weight - kg                               |  | 65 ± 12         | 61 ± 15         |
| Height - m                                |  | 1.6 ± 0.4       | 1.6 ± 0.6       |
| BMI - kg·m <sup>-2</sup>                  |  | 24.3 ± 4.3      | 25.2 ± 6.0      |
| Comorbidities                             |  |                 |                 |
| Number of comorbidities per individual    |  | 3 ± 1           | 4 ± 1           |
| CardiovascularDisease - n (%)             |  | 2 (6)           | 4 (12)          |
| Diabetes - n (%)                          |  | 4 (12)          | 3 (9)           |
| Arthrosis- n (%)                          |  | 3 (9)           | 4 (12)          |
| Pharmacological Treatment                 |  |                 |                 |
| Number of medications per individual      |  | 1 ± 0.5         | 4.2 ± 2.2*      |
| Antihypertensive - n (%)                  |  | 4 (12)          | 8 (24)*         |
| Cardiovascularmedication– n (%)           |  | 2 (6)           | 3 (9)           |
| Antipsychotics and antidepressant - n (%) |  | 0               | 11 (32)*        |
| Benzodiazepines – n (%)                   |  | 2 (6)           | 7 (20)*         |

**Supplementary Table S1.** Demographic and clinical features of the examined CBR and OLD populations.\*=  
significant difference between groups, p<0.05

Supplementary Table S2

| Functional enrichments in your network |                                                                 |                  |          |                        | <a href="#">explain columns</a> |
|----------------------------------------|-----------------------------------------------------------------|------------------|----------|------------------------|---------------------------------|
| Biological Process (Gene Ontology)     |                                                                 |                  |          |                        |                                 |
| GO-term                                | description                                                     | count in network | strength | ▲ false discovery rate |                                 |
| GO:0045582                             | positive regulation of T cell differentiation                   | 3 of 78          | 2.4      | 3.65e-05               |                                 |
| GO:0050671                             | positive regulation of lymphocyte proliferation                 | 3 of 130         | 2.18     | 5.46e-05               |                                 |
| GO:0042110                             | T cell activation                                               | 3 of 225         | 1.94     | 5.56e-05               |                                 |
| GO:0032660                             | regulation of interleukin-17 production                         | 2 of 23          | 2.75     | 0.00011                |                                 |
| GO:0001819                             | positive regulation of cytokine production                      | 3 of 390         | 1.7      | 0.00016                |                                 |
| GO:0030890                             | positive regulation of B cell proliferation                     | 2 of 42          | 2.49     | 0.00025                |                                 |
| GO:0010469                             | regulation of signaling receptor activity                       | 3 of 577         | 1.53     | 0.00042                |                                 |
| GO:0042531                             | positive regulation of tyrosine phosphorylation of STAT prot... | 2 of 60          | 2.34     | 0.00046                |                                 |
| GO:0032729                             | positive regulation of interferon-gamma production              | 2 of 66          | 2.3      | 0.00050                |                                 |
| GO:0019221                             | cytokine-mediated signaling pathway                             | 3 of 655         | 1.48     | 0.00052                |                                 |
| GO:0046634                             | regulation of alpha-beta T cell activation                      | 2 of 86          | 2.18     | 0.00073                |                                 |
| GO:0002708                             | positive regulation of lymphocyte mediated immunity             | 2 of 88          | 2.17     | 0.00074                |                                 |
| GO:0002824                             | positive regulation of adaptive immune response based on ...    | 2 of 89          | 2.17     | 0.00074                |                                 |
| GO:0042102                             | positive regulation of T cell proliferation                     | 2 of 92          | 2.15     | 0.00078                |                                 |
| GO:0097191                             | extrinsic apoptotic signaling pathway                           | 2 of 93          | 2.15     | 0.00078                |                                 |
| GO:0030217                             | T cell differentiation                                          | 2 of 131         | 2.0      | 0.0013                 |                                 |
| GO:0009967                             | positive regulation of signal transduction                      | 3 of 1493        | 1.12     | 0.0032                 |                                 |
| GO:0042981                             | regulation of apoptotic process                                 | 3 of 1501        | 1.12     | 0.0032                 |                                 |
| GO:0045927                             | positive regulation of growth                                   | 2 of 252         | 1.71     | 0.0035                 |                                 |
| GO:0006955                             | immune response                                                 | 3 of 1560        | 1.1      | 0.0035                 |                                 |
| GO:0002250                             | adaptive immune response                                        | 2 of 280         | 1.67     | 0.0039                 |                                 |
| GO:0031349                             | positive regulation of defense response                         | 2 of 365         | 1.55     | 0.0062                 |                                 |
| GO:0032103                             | positive regulation of response to external stimulus            | 2 of 499         | 1.42     | 0.0107                 |                                 |
| GO:0008285                             | negative regulation of cell population proliferation            | 2 of 669         | 1.29     | 0.0175                 |                                 |
| GO:0043066                             | negative regulation of apoptotic process                        | 2 of 859         | 1.18     | 0.0271                 |                                 |
| GO:0002252                             | immune effector process                                         | 2 of 927         | 1.15     | 0.0304                 |                                 |
| GO:1902533                             | positive regulation of intracellular signal transduction        | 2 of 959         | 1.13     | 0.0315                 |                                 |
| GO:0007267                             | cell-cell signaling                                             | 2 of 1073        | 1.08     | 0.0372                 |                                 |
| GO:0051241                             | negative regulation of multicellular organismal process         | 2 of 1098        | 1.07     | 0.0383                 |                                 |
| GO:0048523                             | negative regulation of cellular process                         | 3 of 4454        | 0.64     | 0.0485                 |                                 |
| Molecular Function (Gene Ontology)     |                                                                 |                  |          |                        |                                 |
| GO-term                                | description                                                     | count in network | strength | ▲ false discovery rate |                                 |
| GO:0005125                             | cytokine activity                                               | 6 of 216         | 1.89     | 9.38e-10               |                                 |
| GO:0005126                             | cytokine receptor binding                                       | 6 of 272         | 1.79     | 1.83e-09               |                                 |
| GO:0008009                             | chemokine activity                                              | 4 of 48          | 2.37     | 2.67e-08               |                                 |
| GO:0048020                             | CCR chemokine receptor binding                                  | 3 of 41          | 2.31     | 3.58e-06               |                                 |
| GO:0031726                             | CCR1 chemokine receptor binding                                 | 2 of 6           | 2.97     | 2.09e-05               |                                 |
| GO:0031730                             | CCR5 chemokine receptor binding                                 | 2 of 7           | 2.9      | 2.39e-05               |                                 |
| GO:0048019                             | receptor antagonist activity                                    | 2 of 14          | 2.6      | 6.87e-05               |                                 |
| GO:0070851                             | growth factor receptor binding                                  | 2 of 131         | 1.63     | 0.0043                 |                                 |
| GO:0019887                             | protein kinase regulator activity                               | 2 of 193         | 1.46     | 0.0085                 |                                 |

**Supplementary Table S2.** List of the main biological and molecular functions found over-expressed in the plasma of CBR individuals compared with age-matched OLD controls and examined by using STRING protein-protein interaction analysis.

Supplementary Table S3

| Functional enrichments in your network |                                                                 |                  |          |                      |
|----------------------------------------|-----------------------------------------------------------------|------------------|----------|----------------------|
| Biological Process (Gene Ontology)     |                                                                 |                  |          |                      |
| GO-term                                | description                                                     | count in network | strength | false discovery rate |
| GO:0045582                             | positive regulation of T cell differentiation                   | 3 of 78          | 2.4      | 3.65e-05             |
| GO:0050671                             | positive regulation of lymphocyte proliferation                 | 3 of 130         | 2.18     | 5.46e-05             |
| GO:0042110                             | T cell activation                                               | 3 of 225         | 1.94     | 5.56e-05             |
| GO:0032660                             | regulation of interleukin-17 production                         | 2 of 23          | 2.75     | 0.00011              |
| GO:0001819                             | positive regulation of cytokine production                      | 3 of 390         | 1.7      | 0.00016              |
| GO:0030890                             | positive regulation of B cell proliferation                     | 2 of 42          | 2.49     | 0.00025              |
| GO:0010469                             | regulation of signaling receptor activity                       | 3 of 577         | 1.53     | 0.00042              |
| GO:0042531                             | positive regulation of tyrosine phosphorylation of STAT prot... | 2 of 60          | 2.34     | 0.00046              |
| GO:0032729                             | positive regulation of interferon-gamma production              | 2 of 66          | 2.3      | 0.00050              |
| GO:0019221                             | cytokine-mediated signaling pathway                             | 3 of 655         | 1.48     | 0.00052              |
| GO:0046634                             | regulation of alpha-beta T cell activation                      | 2 of 86          | 2.18     | 0.00073              |
| GO:0002708                             | positive regulation of lymphocyte mediated immunity             | 2 of 88          | 2.17     | 0.00074              |
| GO:0002824                             | positive regulation of adaptive immune response based on ...    | 2 of 89          | 2.17     | 0.00074              |
| GO:0042102                             | positive regulation of T cell proliferation                     | 2 of 92          | 2.15     | 0.00078              |
| GO:0097191                             | extrinsic apoptotic signaling pathway                           | 2 of 93          | 2.15     | 0.00078              |
| GO:0030217                             | T cell differentiation                                          | 2 of 131         | 2.0      | 0.0013               |
| GO:0009967                             | positive regulation of signal transduction                      | 3 of 1493        | 1.12     | 0.0032               |
| GO:0042981                             | regulation of apoptotic process                                 | 3 of 1501        | 1.12     | 0.0032               |
| GO:0045927                             | positive regulation of growth                                   | 2 of 252         | 1.71     | 0.0035               |
| GO:0006955                             | immune response                                                 | 3 of 1560        | 1.1      | 0.0035               |
| GO:0002250                             | adaptive immune response                                        | 2 of 280         | 1.67     | 0.0039               |
| GO:0031349                             | positive regulation of defense response                         | 2 of 365         | 1.55     | 0.0062               |
| GO:0032103                             | positive regulation of response to external stimulus            | 2 of 499         | 1.42     | 0.0107               |
| GO:0008285                             | negative regulation of cell population proliferation            | 2 of 669         | 1.29     | 0.0175               |
| GO:0043066                             | negative regulation of apoptotic process                        | 2 of 859         | 1.18     | 0.0271               |
| GO:0002252                             | immune effector process                                         | 2 of 927         | 1.15     | 0.0304               |
| GO:1902533                             | positive regulation of intracellular signal transduction        | 2 of 959         | 1.13     | 0.0315               |
| GO:0007267                             | cell-cell signaling                                             | 2 of 1073        | 1.08     | 0.0372               |
| GO:0051241                             | negative regulation of multicellular organismal process         | 2 of 1098        | 1.07     | 0.0383               |
| GO:0048523                             | negative regulation of cellular process                         | 3 of 4454        | 0.64     | 0.0485               |
| Molecular Function (Gene Ontology)     |                                                                 |                  |          |                      |
| GO-term                                | description                                                     | count in network | strength | false discovery rate |
| GO:0005126                             | cytokine receptor binding                                       | 3 of 272         | 1.86     | 2.47e-05             |
| GO:0005125                             | cytokine activity                                               | 3 of 216         | 1.96     | 1.66e-05             |
| GO:0070851                             | growth factor receptor binding                                  | 3 of 131         | 2.17     | 1.13e-05             |
| GO:0008083                             | growth factor activity                                          | 3 of 160         | 2.09     | 1.13e-05             |

**Supplementary Table S3.** List of the main biological and molecular functions found over-expressed in the plasma of OLD controls compared with age-matched CBR individuals and examined by using STRING protein-protein interaction analysis.

Supplementary Table S4

| Targets       | Assay Working Range (pg/ml)<br>LLOQ - ULOQ | Assay Precision<br>%CV |
|---------------|--------------------------------------------|------------------------|
| IL-1ra        | 4.46 - 19409.64                            | 2.5                    |
| IL-2          | 1.36 - 1877.62                             | 1.36                   |
| IL-7          | 0.5 - 9517.42                              | 2.4                    |
| IL-9          | 0.68 - 44521.16                            | 2.3                    |
| IL-12p70      | 0.32 - 20257.68                            | 1.7                    |
| PDGF-b        | 0.4 - 6778.53                              | 3.5                    |
| CL2 (MCP-1)   | 0.4 - 1856.64                              | 2.2                    |
| CCL4 (MIP-1b) | 3.92 - 72682.14                            | 2.0                    |
| CCL5 (RANTES) | 0.95 - 11771.91                            | 2.8                    |
| CXCL10(IP-10) | 3.34 - 50375.34                            | 2.8                    |

**Supplementary Table S4.** Performance characteristics of protein expression levels analysis by Bio-Plex assay.
